# Supplementary material for: High crystal quality and purity Cu2O by consecutive in situ annealing and thermal oxidation of Cu under H2 and O2 at elevated temperatures
Source: Royal Society of Chemistry journal article supplement (doi:10.1039/d4ce01276c), 2025-01-01
Supplement: d4ce01276c1.pdf [file d4ce01276c1.pdf]

# Supporting Information

## High Crystal Quality and Purity Cu<sub>2</sub>O by Consecutive In-Situ Annealing and Thermal Oxidation of Cu under H<sub>2</sub> and O<sub>2</sub> at Elevated Temperatures

Matthew Zervos <sup>a</sup>, Ioannis Paschos <sup>b</sup>, Pavlos Savvidis, <sup>b</sup> Nikoleta Florini <sup>c</sup>, Konstantinos Koutsokostas <sup>c</sup>, Philomela Komninou <sup>c</sup>, Nektarios N Lathiotakis <sup>d</sup>, P. M. Levendis <sup>e</sup>, Sarantos Marinakis <sup>e</sup>

<sup>a</sup>, \* Nanostructured Materials *and* Devices Laboratory, School *of* Engineering, University *of* Cyprus, PO Box 20537, Nicosia, 1678, Cyprus.

<sup>b</sup> International Center for Polaritonics (ICP), Department *of* Physics, Westlake University, Zhejiang, Hangzhou, Xihu, 310024, China

<sup>c</sup> Department *of* Condensed Matter and Materials Physics, School *of* Physics, Aristotle University *of* Thessaloniki, GR-54124, Thessaloniki, Greece.

<sup>d</sup> Theoretical and Physical Chemistry Institute, National Hellenic Research Foundation, Vass. Constantinou 48, GR-11635 Athens, Greece.

<sup>e</sup> Department of Chemistry, University *of* Patras, University Campus, GR-26504 Rion, Achaia, Greece.

## **S1. Oxidation of Cu in Air**

We tried to obtain  $\text{Cu}_2\text{O}$  via the thermal oxidation of Cu in air at  $1040^\circ\text{C}$  for 60 min without supplying any Ar and  $\text{O}_2$  but the Cu was converted into CuO not  $\text{Cu}_2\text{O}$ . In this case the Cu was inserted in a 1200 mm long, 1" quartz tube at room temperature with both ends open to air. This was heated up in a 500 mm long single zone furnace. The temperature was ramped to  $1040^\circ\text{C}$  at  $30^\circ\text{C}/\text{min}$  and maintained at this temperature for 60 min after which the tube was retracted during cool down. The complete oxidation of Cu from  $\text{Cu}^0$  to  $\text{Cu}^{+2}$  is attributed to the reaction of Cu with excess  $\text{O}_2$  during the temperature ramp at low and intermediate temperatures.

We also tried to obtain  $\text{Cu}_2\text{O}$  from Cu in a controlled fashion by using a constant flow of 150 ml/min Ar and 50 ml/min  $\text{O}_2$  during the purge, ramp and thermal oxidation step at  $1040^\circ\text{C}$  for 60 min at 1 atm but the Cu was again completely oxidized into CuO due to the excess of  $\text{O}_2$  at low and intermediate temperatures.

## **S2. Dry Oxidation of Cu**

A  $120\ \mu\text{m}$  thick Cu was loaded into a 600 mm long, 1" diameter, hot wall reactor which was purged at room temperature with a high flow of 1000 ml/min Ar and 50 ml/min  $\text{H}_2$  for 10 min in order to eliminate air and moisture after which the temperature was increased to  $1040^\circ\text{C}$  at  $30^\circ\text{C}/\text{min}$  using a flow of 100 ml/min Ar and 50 m/min  $\text{H}_2$  in order to prevent the thermal oxidation of Cu during the temperature ramp. Once the temperature reached  $1040^\circ\text{C}$ , the same flow of 100 ml/min Ar and 50 m/min  $\text{H}_2$  was maintained for a further 30 min to eliminate all oxides from the Cu and promote grain growth. At the end of this step, the  $\text{H}_2$  was purged with 100 ml/min Ar for 15 min in order

to avoid a violent reaction upon admitting O<sub>2</sub>. Subsequently, the thermal oxidation of Cu took place under 100 ml/min Ar and 25 ml/min O<sub>2</sub> at 1040°C for different times i.e. 10, 30 and 60 min. To suppress the reaction of Cu<sub>2</sub>O with O<sub>2</sub> during cool down the tube was purged with a flow of 1000 ml/min Ar for 15 min at 1040°C. The same flow of Ar was maintained for 30 min upon cool down. When the temperature fell below 1000°C, the Cu<sub>2</sub>O was moved rapidly in less than 10 s to the cold end of the reactor outside the heated zone on the upstream side using a rod under a flow of 1000 ml/min Ar to prevent air reaching the Cu<sub>2</sub>O from the downstream end that was open to air during the transfer. The Cu<sub>2</sub>O was removed from the heated zone between 800°C and 900°C and exposed to the air after cooling down to room temperature. The Cu was not completely converted into Cu<sub>2</sub>O within 10 minutes. We find that the Cu is converted into Cu<sub>2</sub>O after 30 or 60 min of thermal oxidation. The Cu<sub>2</sub>O obtained in this way was covered with a layer that had a distinct silver-grey mirror-like surface but one could only see the ruby-like dark red Cu<sub>2</sub>O crystal beneath under direct sunlight. Even though the thermal oxidation of Cu was carried out under Ar and O<sub>2</sub> at 1040°C one might argue that traces of H<sub>2</sub> left over from the temperature ramp might react with the O<sub>2</sub> leading to the formation of H<sub>2</sub>O which may be responsible for the growth of Cu<sub>2</sub>O. Consequently, we carried out the thermal oxidation of Cu by using O<sub>2</sub> at 1040°C and a low pressure of 1 mbar to eliminate all H<sub>2</sub>O. In this case the 1" tube was purged with 100 ml/min Ar for 10 min after which the temperature was ramped to 1040°C at 30°C/min under 100 ml Ar/min. Upon reaching 1040°C, the flow of Ar was interrupted and a flow of 50 ml/min O<sub>2</sub> was initiated and maintained for 60 min after which cool down took place under 100 ml/min Ar at 0.1 mbar. It should be emphasized here that no H<sub>2</sub> was used in this process. In this case, we obtain dark red Cu<sub>2</sub>O crystals via dry oxidation according to  $4\text{Cu} + \text{O}_2 \rightleftharpoons 2\text{Cu}_2\text{O}$ . However, the Cu<sub>2</sub>O crystals

were not so transparent as those obtained after annealing the Cu under H<sub>2</sub> and have a higher content of black inclusions of CuO.

### **S3. Wet Oxidation of Cu**

For completeness, we investigated the wet oxidation of Cu via the in-situ reaction of H<sub>2</sub> and O<sub>2</sub> at 1040°C. The room temperature purge, ramp and annealing steps using Ar and H<sub>2</sub> are identical to those described in S2. However, the oxidation took place under 100 ml/min Ar, 10 ml/min O<sub>2</sub> and 20 ml/min H<sub>2</sub> at 1040°C for different times i.e. 15, 30 and 60 min after which the cool down process etc. is again identical to that described in S2.

The reaction of 10 ml/min O<sub>2</sub> and 20 ml/min H<sub>2</sub> at 1040°C was not violent or an issue in this short reactor which had a length of 600 mm but was in the case of a 1200 mm long tube. We find that the Cu was converted into ruby-like, dark red Cu<sub>2</sub>O under 10 ml/min O<sub>2</sub> and 20 ml/min H<sub>2</sub> at 1040°C for 30 min but shorter times i.e. 5 min were not sufficient for the complete conversion of the Cu into Cu<sub>2</sub>O. We find that 10 ml/min O<sub>2</sub> and an excess of H<sub>2</sub> i.e. 30 ml/min H<sub>2</sub> resulted into the complete oxidation and growth of dark-grey, opaque CuO via the complete reaction of O<sub>2</sub> and H<sub>2</sub>; an even larger excess of 40 ml/min H<sub>2</sub> prevented the complete oxidation via reduction leaving Cu beneath the opaque CuO. To avoid using H<sub>2</sub> and O<sub>2</sub> for the in-situ generation of H<sub>2</sub>O we used a bubbler with de-ionized (DI) H<sub>2</sub>O on a hot plate set at 100°C that was fed with Ar from a separate manifold and connected to the upstream side of the 1" tube via a valve used to isolate the bubbler from the reactor. The process was repeated in the same way except that thermal oxidation at 1040°C took place under 100 ml/min Ar and 25 ml/min O<sub>2</sub> for 30 min along with a flow of 1000ml/min Ar which was established through the heated bubbler containing H<sub>2</sub>O. The Cu was converted into ruby-like, dark red Cu<sub>2</sub>O due to the availability of O<sub>2</sub>. We tried to obtain Cu<sub>2</sub>O via

the wet oxidation of Cu at 1020°C for 30 min using 1000 ml/min Ar flowing through the bubbler with H<sub>2</sub>O maintained at 100°C but without any O<sub>2</sub>. This did not result in the growth of Cu<sub>2</sub>O. In summary, Cu<sub>2</sub>O is formed through dry oxidation, which requires O<sub>2</sub>, rather than through wet oxidation using only H<sub>2</sub>O.
